# Supplementary material for: Chemical Constituents and Molecular Mechanism of the Yellow Phenotype of Yellow Mushroom (Floccularia luteovirens)
Source: MDPI journal article supplement (doi:10.3390/jof8030314), 2022-03-18
Supplement: s1 [file s1]

**Table S3.** Distribution of the Clean Reads of the sequencing.

| Sample | Total Raw Reads(Mb) | Total Clean Reads(Mb) | Total Clean Bases(Gb) | Clean Reads Q20(%) | Clean Reads Q30(%) | Clean Reads Ratio(%) |
|--------|---------------------|-----------------------|-----------------------|--------------------|--------------------|----------------------|
| White  | 52.66               | 52.65                 | 7.9                   | 97.19              | 92.89              | 99.99                |
| Yellow | 50.29               | 50.29                 | 7.54                  | 97.64              | 93.96              | 99.99                |

**Table S4.** Distribution of the lengths of the assembled unigenes.

| Sample      | Total Number | Total Length | Mean Length | N50  | N70  | N90  | GC(%) |
|-------------|--------------|--------------|-------------|------|------|------|-------|
| White       | 22823        | 57646679     | 2525        | 3805 | 2626 | 1353 | 45.33 |
| Yellow      | 21023        | 47993042     | 2282        | 3506 | 2357 | 1218 | 45.45 |
| All-Unigene | 43750        | 1.06E+08     | 2424        | 3782 | 2529 | 1298 | 46.53 |

**Table S5.** Phylogenetic analysis of KOG species.

| species                                   | gene numbers | percentage |
|-------------------------------------------|--------------|------------|
| Agaricus bisporus var. bisporus H97       | 7274         | 20.32      |
| Agaricus bisporus var. burnettii JB137-S8 | 6175         | 17.25      |
| Galerina marginata CBS 339.88             | 4136         | 11.55      |
| Laccaria amethystina LaAM-08-1            | 3885         | 10.85      |
| Laccaria bicolor S238N-H82                | 2379         | 6.65       |
| Hebeloma cylindrosporum h7                | 2019         | 5.64       |
| Leucoagaricus sp. SymC.cos                | 1776         | 4.96       |
| Hypholoma sublateritium FD-334 SS-4       | 1037         | 2.9        |
| others                                    | 7085         | 19.88      |

**Table S6.** The primers used in this study.

| Primer name      | Sequence                             |
|------------------|--------------------------------------|
| FIMCH5-F         | ATGGAACCCTCGATACACGA                 |
| FIMCH5-R         | TCACACTATCTGGGTCCCTC                 |
| FIMCH5-GUS-F     | ATGGAACCCTCGATACACGA                 |
| FIMCH5-GUS-R     | CACTATCTGGGTCCCTC                    |
| FIMCH5-GUS attb1 | AAAAAGCAGGCTTCATGGAACCCTCGATACACGATG |
| FIMCH5-GUS attb2 | AGAAAGCTGGGTCCACTATCTGGGTCCCTCTTT    |
| FIMCH5-XbaI      | ggtctagaATGGAACCCTCGATACACGA         |
| FIMCH5-BamHI     | ggggatccTCACACTATCTGGGTCCCTC         |
